# Supplementary material
Source: PubMed Central journal article supplement (PMC3269022)
Supplement: supp_125.1.49_JCS085118TableS1.pdf [file supp_125.1.49_JCS085118TableS1.pdf]

**Table S1. Strains used in this study**

| Strain | Relevant genotype                                                                                               | Source                     |
|--------|-----------------------------------------------------------------------------------------------------------------|----------------------------|
| ATY104 | ATCC 201388: <i>mat a his3Δ1 leu2Δ0 met15Δ0 ura3Δ0 YPR091c-GFP::HIS3</i>                                        | (Huh <i>et al.</i> , 2003) |
| ATY192 | BY4742 <i>mat α leu2Δ his3Δ ura3Δ lys1Δ</i><br>p413GALL1-NVJ1-mCherry-HIS3<br>p416GALL1-YPR091c(1-770)-GFP-URA3 | this study                 |
| ATY182 | W303 <i>mat a leu2Δ his3Δ ade2Δ trp1Δ ssRFP-HDEL::TRP1</i> p416GALL1-YPR091c(1-770)-GFP-URA3                    | this study                 |
| ATY180 | BY4741 <i>mat a leu2Δ his3Δ ura3Δ met15Δ nvj1::kanMX6</i><br>p416GALL1-YPR091c(1-770)-GFP-URA3                  | this study                 |
| ATY181 | BY4741 <i>mat a leu2Δ his3Δ ura3Δ met15Δ vac8::kanMX6</i><br>p416GALL1-YPR091c(1-770)-GFP-URA3                  | this study                 |
| ATY214 | BY4741 <i>mat a leu2Δ his3Δ ura3Δ met15Δ</i><br>p416PHO5 <sub>pr</sub> -GFP-OSHI-URA3                           | this study                 |
| ATY183 | BY4741 <i>mat a leu2Δ his3Δ ura3Δ met15Δ nvj1::kanMX6</i><br>p416PHO5 <sub>pr</sub> -GFP-OSHI-URA3              | this study                 |
| ATY187 | BY4741 <i>mat a leu2Δ his3Δ ura3Δ met15Δ ypr091c::kanMX6</i><br>p416PHO5 <sub>pr</sub> -GFP-OSHI-URA3           | this study                 |
| ATY246 | ATCC 201388: <i>mat a his3Δ1 leu2Δ0 met15Δ0 ura3Δ0</i><br>NVJ1-GFP::HIS3                                        | (Huh <i>et al.</i> , 2003) |
| ATY223 | ATCC 201388: <i>mat a his3Δ1 leu2Δ0 met15Δ0 ura3Δ0</i><br>PUS1-GFP::HIS3                                        | (Huh <i>et al.</i> , 2003) |
| ATY225 | ATCC 201388: <i>mat a his3Δ1 leu2Δ0 met15Δ0 ura3Δ0</i><br>PUS1-GFP::HIS3 <i>osh1::kanMX6</i>                    | this study                 |
| ATY224 | ATCC 201388: <i>mat a his3Δ1 leu2Δ0 met15Δ0 ura3Δ0</i><br>PUS1-GFP::HIS3 <i>nvj2::kanMX6</i>                    | this study                 |
| ATY227 | ATCC 201388: <i>mat a his3Δ1 leu2Δ0 met15Δ0 ura3Δ0</i><br>PUS1-GFP::HIS3 <i>erg5::kanMX6</i>                    | this study                 |
| WPY971 | W303 <i>mat a leu2Δ his3Δ ade2Δ trp1Δ ssRFP-HDEL::TRP1 TCB1-GFP::HIS3</i>                                       | this study                 |
| WPY973 | W303 <i>mat a leu2Δ his3Δ ade2Δ trp1Δ ssRFP-HDEL::TRP1 TCB2-GFP::HIS3</i>                                       | this study                 |
| WPY975 | W303 <i>mat a leu2Δ his3Δ ade2Δ trp1Δ ssRFP-HDEL::TRP1 TCB3-</i>                                                | this study                 |

*GFP::HIS3*

|        |                                                                                                                                                                                            |            |
|--------|--------------------------------------------------------------------------------------------------------------------------------------------------------------------------------------------|------------|
| ATY33  | W303 mat a <i>leu2Δ his3Δ ade2Δ trp1Δ ssRFP-HDEL::TRP1</i> p416GALL1-<br><i>TCB2(1-1178)-GFP-URA3</i>                                                                                      | this study |
| ATY34  | W303 mat a <i>leu2Δ his3Δ ade2Δ trp1Δ ssRFP-HDEL::TRP1</i> p416GALL1-<br><i>TCB2(1-150)-GFP-URA3</i>                                                                                       | this study |
| ATY36  | W303 mat a <i>leu2Δ his3Δ ade2Δ trp1Δ ssRFP-HDEL::TRP1</i> p416GALL1-<br><i>TCB2(150-1178)-GFP-URA3</i>                                                                                    | this study |
| ATY37  | W303 mat a <i>leu2Δ his3Δ ade2Δ trp1Δ ssRFP-HDEL::TRP1</i> p416GALL1-<br><i>TCB2(375-1178)-GFP-URA3</i>                                                                                    | this study |
| ATY38  | W303 mat a <i>leu2Δ his3Δ ade2Δ trp1Δ ssRFP-HDEL::TRP1</i> p416GALL1-<br><i>TCB2(150-375)-GFP-URA3</i>                                                                                     | this study |
| ATY280 | W303/BY4742 mat a/ $\alpha$ <i>leu2Δ/leu2Δ his3Δ/his3Δ ura3Δ/ura3Δ RTNI-</i><br><i>RFP::TRP1 TCB1-GFP::HIS3</i>                                                                            | this study |
| ATY281 | W303/BY4742 mat a/ $\alpha$ <i>leu2Δ/leu2Δ his3Δ/his3Δ ura3Δ/ura3Δ RTNI-</i><br><i>RFP::TRP1 TCB2-GFP::HIS3</i>                                                                            | this study |
| ATY282 | W303/BY4742 mat a/ $\alpha$ <i>leu2Δ/leu2Δ his3Δ/his3Δ ura3Δ/ura3Δ RTNI-</i><br><i>RFP::TRP1 TCB3-GFP::HIS3</i>                                                                            | this study |
| ATY200 | BY4742 mat $\alpha$ <i>leu2Δ his3Δ ura3Δ lys1Δ</i><br>pRS314-SEC63-GFP-URA3                                                                                                                | this study |
| ATY201 | BY4741 mat a <i>leu2Δ his3Δ ura3Δ met15Δ</i><br><i>tcb1::kanMX6 tcb2::kanMX6 tcb3::kanMX6</i><br>pRS314-SEC63-GFP-URA3                                                                     | this study |
| ATY57  | W303/BY4742 mat a/ $\alpha$ <i>leu2Δ/leu2Δ his3Δ/his3Δ ura3Δ/ura3Δ lys1Δ/LYS1</i><br><i>ade2Δ/ADE2 trp1Δ/TRP1 ssRFP-HDEL::TRP1</i><br><i>SEC63-F1venus::HIS3 PMA1-F2venus::URA3</i>        | this study |
| ATY98  | W303/BY4742 mat a/ $\alpha$ <i>leu2Δ/leu2Δ his3Δ/his3Δ ura3Δ/ura3Δ lys1Δ/LYS1</i><br><i>ade2Δ/ADE2 trp1Δ/TRP1 ssRFP-HDEL::TRP1</i><br><i>SEC63(1-250)-F1venus::HIS3 PMA1-F2venus::URA3</i> | this study |
| ATY97  | W303/BY4742 mat a/ $\alpha$ <i>leu2Δ/leu2Δ his3Δ/his3Δ ura3Δ/ura3Δ lys1Δ/LYS1</i><br><i>ade2Δ/ADE2 trp1Δ/TRP1 ssRFP-HDEL::TRP1</i><br>P425GALL1-TCB2-F1venus-LEU2 PMA1-F2venus::URA3       | this study |
| ATY54  | W303/BY4742 mat a/ $\alpha$ <i>leu2Δ/leu2Δ his3Δ/his3Δ ura3Δ/ura3Δ lys1Δ/LYS1</i><br><i>ade2Δ/ADE2 trp1Δ/TRP1 ssRFP-HDEL::TRP1</i><br><i>PMA1-F1venus::HIS3 PMA1-F2venus::URA3</i>         | this study |
| ATY18  | BY4741/BY4742 mat a/ $\alpha$ <i>leu2Δ/leu2Δ his3Δ/his3Δ ura3Δ/ura3Δ</i><br><i>lys1Δ/LYS1 met15Δ/MET15</i>                                                                                 | this study |

|        |                                                                                                                                                                                                                                          |            |
|--------|------------------------------------------------------------------------------------------------------------------------------------------------------------------------------------------------------------------------------------------|------------|
|        | <i>SEC63-F1venus::HIS3 PMA1-F2venus::URA3</i>                                                                                                                                                                                            |            |
| ATY234 | Diploid BY4741 mat a/ $\alpha$ <i>leu2<math>\Delta</math> his3<math>\Delta</math> ura3<math>\Delta</math> met15<math>\Delta</math></i><br><i>tcb1::kanMX6 tcb2::kanMX6 tcb3::kanMX6</i><br><i>SEC63-F1venus::HIS3 PMA1-F2venus::URA3</i> | this study |
| ATY196 | W303 mat a <i>leu2<math>\Delta</math> his3<math>\Delta</math> ade2<math>\Delta</math> trp1<math>\Delta</math> ssRFP-HDEL::TRP1</i> p416GALL1- <i>E-Syt1-GFP-URA3</i>                                                                     | this study |
| ATY195 | BY4742 mat $\alpha$ <i>leu2<math>\Delta</math> his3<math>\Delta</math> ura3<math>\Delta</math> lys1<math>\Delta</math></i><br>p413GALL1- <i>NVJ1-mCherry-HIS3</i><br>p416GALL1- <i>HT008-GFP-URA3</i>                                    | this study |
| ATY84  | W303 mat a <i>leu2<math>\Delta</math> his3<math>\Delta</math> ade2<math>\Delta</math> trp1<math>\Delta</math> ssRFP-HDEL::TRP1</i> p416GALL1- <i>TCB2(1-150/375-1178)-GFP-URA3</i>                                                       | this study |
| ATY182 | W303 mat a <i>leu2<math>\Delta</math> his3<math>\Delta</math> ade2<math>\Delta</math> trp1<math>\Delta</math> ssRFP-HDEL::TRP1</i><br>p416GALL1- <i>YPR091c-GFP-URA3</i>                                                                 | this study |
| ATY250 | W303 mat a <i>leu2<math>\Delta</math> his3<math>\Delta</math> ade2<math>\Delta</math> trp1<math>\Delta</math> ssRFP-HDEL::TRP1</i><br>p416GALL1- <i>YPR091c(1-300/505-770)-GFP-URA3</i>                                                  | this study |
| ATY140 | W303 mat a <i>leu2<math>\Delta</math> his3<math>\Delta</math> ade2<math>\Delta</math> trp1<math>\Delta</math> ssRFP-HDEL::TRP1</i><br>p416GALL1- <i>MMM1-GFP-URA3</i>                                                                    | this study |
| ATY142 | W303 mat a <i>leu2<math>\Delta</math> his3<math>\Delta</math> ade2<math>\Delta</math> trp1<math>\Delta</math> ssRFP-HDEL::TRP1</i><br>p416GALL1- <i>MMM1(1-190)-GFP-URA3</i>                                                             | this study |
| ATY127 | BY4742 mat $\alpha$ <i>leu2<math>\Delta</math> his3<math>\Delta</math> ura3<math>\Delta</math> lys1<math>\Delta</math></i><br>p416GALL1- <i>SEC63-GFP-URA3</i>                                                                           | this study |
| ATY257 | W303 mat a <i>leu2<math>\Delta</math> his3<math>\Delta</math> ade2<math>\Delta</math> trp1<math>\Delta</math> ssRFP-HDEL::TRP1</i><br>p416GALL1- <i>SEC63-TCB2(150-1178)-GFP-URA3</i>                                                    | this study |
| ATY218 | BY4742 mat $\alpha$ <i>leu2<math>\Delta</math> his3<math>\Delta</math> ura3<math>\Delta</math> lys1<math>\Delta</math></i><br>p416GALL1- <i>SEC63-MMM1(190-426)-GFP-URA3</i><br>P413GALL1- <i>MMM1-mCherry</i>                           | this study |
| ATY217 | BY4742 mat $\alpha$ <i>leu2<math>\Delta</math> his3<math>\Delta</math> ura3<math>\Delta</math> lys1<math>\Delta</math></i><br>p416GALL1- <i>SEC63-YPR091(40-770)-GFP-URA3</i><br>P413GALL1- <i>NVJ1-mCherry</i>                          | this study |
| ATY287 | BY4741 mat a <i>leu2<math>\Delta</math> his3<math>\Delta</math> ura3<math>\Delta</math> met15<math>\Delta</math></i><br>p416GALL1- <i>MBP-URA3</i>                                                                                       | this study |
| ATY288 | BY4741 mat a <i>leu2<math>\Delta</math> his3<math>\Delta</math> ura3<math>\Delta</math> met15<math>\Delta</math></i><br>p416GALL1- <i>MBP-MDM12-URA3</i>                                                                                 | this study |
| ATY290 | BY4741 mat a <i>leu2<math>\Delta</math> his3<math>\Delta</math> ura3<math>\Delta</math> met15<math>\Delta</math></i><br>p416GALL1- <i>MBP-YPR091c(300-505)-URA3</i>                                                                      | this study |

|        |                                                                                               |                                 |
|--------|-----------------------------------------------------------------------------------------------|---------------------------------|
| ATY289 | BY4741 mat a <i>leu2Δ his3Δ ura3Δ met15Δ</i><br>p416GALL1-MBP-TCB2(150-375)-URA3              | this study                      |
| ATY1   | BY4742 mat α <i>leu2Δ his3Δ ura3Δ lys1Δ</i><br>p416GALL1-GFP-URA3                             | this study                      |
| ATY153 | BY4742 mat α <i>leu2Δ his3Δ ura3Δ lys1Δ</i><br>p416GALL1-MMM1(190-426)-GFP-URA3               | this study                      |
| ATY135 | BY4742 mat α <i>leu2Δ his3Δ ura3Δ lys1Δ</i><br>p416GALL1-YPR091c(300-505)-GFP-URA3            | this study                      |
| WPY333 | BY4741 mat a <i>leu2Δ his3Δ ura3Δ met15Δ</i>                                                  | (Winzeler <i>et al.</i> , 1999) |
| ATY109 | BY4741 mat a <i>leu2Δ his3Δ ura3Δ met15Δ</i><br><i>tcb1::kanMX6 tcb2::kanMX6 tcb3::kanMX6</i> | this study                      |
| ATY291 | BY4741 mat a <i>leu2Δ his3Δ ura3Δ met15Δ</i><br><i>tcb1::kanMX6</i>                           | (Winzeler <i>et al.</i> , 1999) |
| ATY292 | BY4741 mat a <i>leu2Δ his3Δ ura3Δ met15Δ</i><br><i>tcb2::kanMX6</i>                           | (Winzeler <i>et al.</i> , 1999) |
| ATY293 | BY4741 mat a <i>leu2Δ his3Δ ura3Δ met15Δ</i><br><i>tcb3::kanMX6</i>                           | (Winzeler <i>et al.</i> , 1999) |
| ATY294 | BY4741 mat a <i>leu2Δ his3Δ ura3Δ met15Δ</i><br><i>Ypr091c::kanMX6</i>                        | (Winzeler <i>et al.</i> , 1999) |
| WPY267 | BY4741 mat a <i>leu2Δ his3Δ ura3Δ met15Δ</i><br><i>mdm12::URA3</i>                            | J. Nunnari                      |
| CVY551 | BY4741 mat a <i>leu2Δ his3Δ ura3Δ met15Δ</i><br><i>mdm34::kanMX6</i>                          | this study                      |
| ATY297 | BY4741 mat a <i>leu2Δ his3Δ ura3Δ met15Δ</i><br><i>nvj1::kanMX6</i>                           | (Winzeler <i>et al.</i> , 1999) |
| ATY247 | BY4741 mat a <i>leu2Δ his3Δ ura3Δ met15Δ</i><br><i>osh1::kanMX6</i>                           | (Winzeler <i>et al.</i> , 1999) |
| ATY248 | BY4741 mat a <i>leu2Δ his3Δ ura3Δ met15Δ</i><br><i>elo3::kanMX6</i>                           | (Winzeler <i>et al.</i> , 1999) |
| ATY249 | BY4741 mat a <i>leu2Δ his3Δ ura3Δ met15Δ</i><br><i>erg5::kanMX6</i>                           | (Winzeler <i>et al.</i> , 1999) |
| ATY298 | BY4741 mat a <i>leu2Δ his3Δ ura3Δ met15Δ</i><br><i>Ypr091c::kanMX6</i> p416GALL1-GFP-URA3     | this study                      |
| ATY299 | BY4741 mat a <i>leu2Δ his3Δ ura3Δ met15Δ</i>                                                  | this study                      |

|        |                                                                                                                                      |            |
|--------|--------------------------------------------------------------------------------------------------------------------------------------|------------|
|        | <i>Ypr091c::kanMX6</i> p416GALL1- <i>YPR091c</i> -GFP- <i>URA3</i>                                                                   |            |
| ATY300 | BY4741 mat a <i>leu2Δ his3Δ ura3Δ met15Δ</i><br><i>Ypr091c::kanMX6</i><br>p416GALL1- <i>YPR091c</i> (1-300/505-770)-GFP- <i>URA3</i> | this study |
| ATY254 | BY4741 mat a <i>leu2Δ his3Δ ura3Δ met15Δ</i><br><i>mdm12::URA3</i> p413-HIS3                                                         | this study |
| ATY255 | BY4741 mat a <i>leu2Δ his3Δ ura3Δ met15Δ</i><br><i>mdm12::URA3</i> p413-MDM12-HIS3                                                   | this study |
| ATY283 | BY4741 mat a <i>leu2Δ his3Δ ura3Δ met15Δ</i><br><i>mdm12::URA3</i> p413-MDM12P259A-HIS3                                              | this study |
| ATY284 | BY4741 mat a <i>leu2Δ his3Δ ura3Δ met15Δ</i><br><i>mdm12::URA3</i> p413-MDM12E11R, S12A, N17E, K22D -HIS3                            | this study |
| ATY285 | BY4741 mat a <i>leu2Δ his3Δ ura3Δ met15Δ</i><br><i>mdm12::URA3</i> p413-MDM12L16D, L19D, I20D -HIS3                                  | this study |

---
